# Supplementary material for: Genomic selection on shelling percentage and other traits for maize
Source: PubMed Central journal article supplement — Breed Sci. 2019 Apr 11;69(2):266–71. doi: 10.1270/jsbbs.18141 (PMC6711738; doi:10.1270/jsbbs.18141), 2019-04-11
Supplement: 69_18141_1.pdf [file 69_18141_1.pdf]

### Supplemental Data 1. Grain yield at two location in 2016

| Location | Testcross | Grain yield(Kg/mu) |
|----------|-----------|--------------------|
| Jinan    | A001      | 521.9874145        |
| Jinan    | A007      | 617.2029999        |
| Jinan    | A011      | 656.9488372        |
| Jinan    | A012      | 635.6183661        |
| Jinan    | A015      | 597.7785728        |
| Jinan    | A017      | 626.2882497        |
| Jinan    | A023      | 633.3385013        |
| Jinan    | A026      | 626.3843329        |
| Jinan    | A027      | 621.7258262        |
| Jinan    | A029      | 685.4562775        |
| Jinan    | A033      | 705.5785977        |
| Jinan    | A034      | 599.6224437        |
| Jinan    | A036      | 688.8535512        |
| Jinan    | A038      | 584.4343842        |
| Jinan    | A041      | 669.594528         |
| Jinan    | A043      | 676.7890365        |
| Jinan    | A044      | 759.4235377        |
| Jinan    | A047      | 566.1510564        |
| Jinan    | A048      | 566.2790698        |
| Jinan    | A051      | 619.2195122        |
| Jinan    | A052      | 629.4667649        |
| Jinan    | A054      | 667.8002448        |
| Jinan    | A055      | 652.1630125        |
| Jinan    | A058      | 608.4578786        |
| Jinan    | A061      | 640.0788812        |
| Jinan    | A062      | 633.6429918        |
| Jinan    | A067      | 598.386136         |
| Jinan    | A068      | 686.5059794        |
| Jinan    | A069      | 623.6057082        |
| Jinan    | A070      | 669.9724931        |
| Jinan    | A071      | 725.3236839        |
| Jinan    | A072      | 648.9209984        |
| Jinan    | A073      | 614.5177479        |
| Jinan    | A076      | 672.4696814        |
| Jinan    | A077      | 589.3715762        |

|       |      |             |
|-------|------|-------------|
| Jinan | A080 | 596.8190927 |
| Jinan | A081 | 629.8979048 |
| Jinan | A083 | 694.0838608 |
| Jinan | A086 | 660.8485229 |
| Jinan | A087 | 689.370869  |
| Jinan | A091 | 615.1332333 |
| Jinan | A092 | 595.1314507 |
| Jinan | A095 | 718.5335157 |
| Jinan | A096 | 618.8605092 |
| Jinan | A097 | 679.2429158 |
| Jinan | A098 | 673.8452113 |
| Jinan | A099 | 588.7755467 |
| Jinan | A101 | 595.0428397 |
| Jinan | A102 | 601.0917993 |
| Jinan | A103 | 531.4391245 |
| Jinan | A105 | 695.3014504 |
| Jinan | A107 | 655.6472365 |
| Jinan | A111 | 678.7473573 |
| Jinan | A112 | 667.9660591 |
| Jinan | A114 | 665.4878889 |
| Jinan | A115 | 704.5090439 |
| Jinan | A116 | 637.6962209 |
| Jinan | A117 | 663.5540356 |
| Jinan | A118 | 680.477687  |
| Jinan | A119 | 584.4814952 |
| Jinan | A120 | 571.1267301 |
| Jinan | A121 | 665.0790698 |
| Jinan | A124 | 649.6220603 |
| Jinan | A125 | 662.0672159 |
| Jinan | A129 | 572.0038055 |
| Jinan | A130 | 592.3125255 |
| Jinan | A131 | 319.4210526 |
| Jinan | A136 | 627.2924845 |
| Jinan | A137 | 610.9564699 |
| Jinan | A138 | 675.215222  |
| Jinan | A140 | 603.1187271 |
| Jinan | A141 | 664.0424419 |
| Jinan | A142 | 654.6756737 |
| Jinan | A145 | 615.0617512 |

|       |      |             |
|-------|------|-------------|
| Jinan | A146 | 599.4405977 |
| Jinan | A147 | 670.3217054 |
| Jinan | A150 | 628.659381  |
| Jinan | A153 | 676.7931457 |
| Jinan | A154 | 695.7087623 |
| Jinan | A155 | 640.7275942 |
| Jinan | A156 | 644.6639045 |
| Jinan | A158 | 624.4510944 |
| Jinan | A160 | 608.2511628 |
| Jinan | A163 | 670.8020672 |
| Jinan | A164 | 704.1781536 |
| Jinan | A166 | 632.0683847 |
| Jinan | A169 | 653.48012   |
| Jinan | A171 | 595.9508346 |
| Jinan | A172 | 641.8604651 |
| Jinan | A173 | 664.4328535 |
| Jinan | A176 | 706.9114716 |
| Jinan | A178 | 672.3052787 |
| Jinan | A179 | 656.5504539 |
| Jinan | A181 | 615.8460696 |
| Jinan | A182 | 631.7752357 |
| Jinan | A185 | 581.5135162 |
| Jinan | A186 | 726.2147743 |
| Jinan | A187 | 697.9710874 |
| Jinan | A199 | 729.4230343 |
| Jinan | A203 | 649.244357  |
| Jinan | A204 | 666.833512  |
| Jinan | A205 | 661.2172039 |
| Jinan | A208 | 665.3201834 |
| Jinan | A213 | 674.7164077 |
| Jinan | A214 | 649.4670986 |
| Jinan | A216 | 655.3970686 |
| Jinan | A219 | 588.1979726 |
| Jinan | A222 | 611.9224566 |
| Jinan | A224 | 676.4292359 |
| Jinan | A225 | 647.8139535 |
| Jinan | A226 | 571.2031992 |
| Jinan | A228 | 674.115059  |
| Jinan | A229 | 702.0574555 |

|       |      |             |
|-------|------|-------------|
| Jinan | A231 | 723.0031712 |
| Jinan | A232 | 661.0585108 |
| Jinan | A235 | 664.3410853 |
| Jinan | A237 | 613.681961  |
| Jinan | A238 | 523.8039867 |
| Jinan | A241 | 534.9126145 |
| Jinan | A242 | 685.2311902 |
| Jinan | A244 | 634.2976151 |
| Jinan | A245 | 582.3377501 |
| Jinan | A246 | 639.4760183 |
| Jinan | A248 | 623.276881  |
| Jinan | A249 | 631.0049873 |
| Jinan | A250 | 670.387966  |
| Jinan | A251 | 632.1074796 |
| Jinan | A252 | 658.6787026 |
| Jinan | A253 | 662.1143817 |
| Jinan | A254 | 637.2631393 |
| Jinan | A256 | 601.8710963 |
| Jinan | A257 | 605.8875969 |
| Jinan | A260 | 650.6959713 |
| Jinan | A262 | 648.1085271 |
| Jinan | A263 | 709.1733922 |
| Jinan | A264 | 670.1049664 |
| Jinan | A265 | 625.907993  |
| Jinan | A268 | 701.6241358 |
| Jinan | A269 | 652.7300789 |
| Jinan | A270 | 681.1705426 |
| Jinan | A271 | 670.9515063 |
| Jinan | A272 | 676.507158  |
| Jinan | A273 | 650.4168157 |
| Jinan | A274 | 652.6534412 |
| Jinan | A276 | 689.5780563 |
| Jinan | A280 | 497.2651522 |
| Jinan | A281 | 703.0158694 |
| Jinan | A282 | 644.143032  |
| Jinan | A284 | 656.9887521 |
| Jinan | A285 | 659.7638515 |
| Jinan | A288 | 659.7536141 |
| Jinan | A289 | 642.3087095 |

|          |      |             |
|----------|------|-------------|
| Jinan    | A291 | 636.8513294 |
| Jinan    | A294 | 665.1513668 |
| Jinan    | A295 | 610.5875153 |
| Jinan    | A296 | 706.2293869 |
| Jinan    | A297 | 650.7112913 |
| Jinan    | A298 | 652.5502763 |
| Jinan    | A300 | 536.3635659 |
| xinxiang | A001 | 462.8653611 |
| xinxiang | A007 | 464.5034884 |
| xinxiang | A011 | 594.9042408 |
| xinxiang | A012 | 429.8498943 |
| xinxiang | A015 | 509.6434109 |
| xinxiang | A017 | 468.25323   |
| xinxiang | A023 | 422.9810642 |
| xinxiang | A026 | 525.127223  |
| xinxiang | A027 | 573.2851635 |
| xinxiang | A029 | 383.9045102 |
| xinxiang | A033 | 504.878249  |
| xinxiang | A034 | 410.1882614 |
| xinxiang | A036 | 630.8459302 |
| xinxiang | A038 | 552.0407997 |
| xinxiang | A041 | 458.3995772 |
| xinxiang | A043 | 491.3813809 |
| xinxiang | A044 | 481.7580288 |
| xinxiang | A047 | 579.3979328 |
| xinxiang | A048 | 410.5387597 |
| xinxiang | A051 | 372.992691  |
| xinxiang | A052 | 484.8285831 |
| xinxiang | A054 | 468.1007752 |
| xinxiang | A055 | 383.0851897 |
| xinxiang | A058 | 342.0758874 |
| xinxiang | A061 | 457.503492  |
| xinxiang | A062 | 644.9754025 |
| xinxiang | A067 | 584.6348772 |
| xinxiang | A068 | 583.6697674 |
| xinxiang | A069 | 472.0200258 |
| xinxiang | A070 | 513.3535    |
| xinxiang | A071 | 432.8212974 |
| xinxiang | A072 | 509.6352941 |

|          |      |             |
|----------|------|-------------|
| xinxiang | A073 | 522.0848837 |
| xinxiang | A076 | 516.1756368 |
| xinxiang | A077 | 433.6816168 |
| xinxiang | A080 | 504.6648987 |
| xinxiang | A081 | 316.9047158 |
| xinxiang | A083 | 480.227021  |
| xinxiang | A086 | 479.8032873 |
| xinxiang | A087 | 546.7738066 |
| xinxiang | A091 | 441.5683995 |
| xinxiang | A092 | 451.9654928 |
| xinxiang | A095 | 546.4118863 |
| xinxiang | A096 | 618.247246  |
| xinxiang | A097 | 445.2629275 |
| xinxiang | A098 | 621.2600221 |
| xinxiang | A099 | 393.1553911 |
| xinxiang | A101 | 451.0790698 |
| xinxiang | A102 | 545.6664821 |
| xinxiang | A103 | 324.7228128 |
| xinxiang | A105 | 424.751938  |
| xinxiang | A107 | 554.3451652 |
| xinxiang | A111 | 576.6302326 |
| xinxiang | A112 | 543.4657026 |
| xinxiang | A114 | 431.7151163 |
| xinxiang | A115 | 533.0871364 |
| xinxiang | A116 | 301.2242031 |
| xinxiang | A117 | 443.3287212 |
| xinxiang | A118 | 522.0304638 |
| xinxiang | A119 | 531.74677   |
| xinxiang | A120 | 412.3422934 |
| xinxiang | A121 | 522.854284  |
| xinxiang | A124 | 434.1478023 |
| xinxiang | A125 | 465.9068407 |
| xinxiang | A129 | 495.4341085 |
| xinxiang | A130 | 375.9623477 |
| xinxiang | A131 | 347.1302326 |
| xinxiang | A136 | 551.9111927 |
| xinxiang | A137 | 448.1300211 |
| xinxiang | A138 | 508.6437632 |
| xinxiang | A140 | 442.7955936 |

|          |      |             |
|----------|------|-------------|
| xinxiang | A141 | 452.6842105 |
| xinxiang | A142 | 540.0538556 |
| xinxiang | A145 | 461.0752827 |
| xinxiang | A146 | 523.3207364 |
| xinxiang | A147 | 431.6086903 |
| xinxiang | A150 | 471.8230536 |
| xinxiang | A153 | 433.6364137 |
| xinxiang | A154 | 446.0647841 |
| xinxiang | A155 | 346.3932347 |
| xinxiang | A156 | 426.4193429 |
| xinxiang | A158 | 500.487361  |
| xinxiang | A160 | 355.0391624 |
| xinxiang | A163 | 554.4134367 |
| xinxiang | A164 | 532.5429727 |
| xinxiang | A166 | 535.9383353 |
| xinxiang | A169 | 589.4533269 |
| xinxiang | A171 | 401.013289  |
| xinxiang | A172 | 506.1414729 |
| xinxiang | A173 | 510.92686   |
| xinxiang | A176 | 524.247246  |
| xinxiang | A178 | 471.6059432 |
| xinxiang | A179 | 483.8967768 |
| xinxiang | A181 | 521.7809058 |
| xinxiang | A182 | 445.0273868 |
| xinxiang | A185 | 403.2715662 |
| xinxiang | A186 | 562.7604499 |
| xinxiang | A187 | 678.373385  |
| xinxiang | A199 | 567.5867248 |
| xinxiang | A203 | 398.7815891 |
| xinxiang | A204 | 565.3125944 |
| xinxiang | A205 | 482.7906977 |
| xinxiang | A208 | 429.8883721 |
| xinxiang | A213 | 515.8365973 |
| xinxiang | A214 | 509.4790698 |
| xinxiang | A216 | 499.4309166 |
| xinxiang | A219 | 461.9151163 |
| xinxiang | A222 | 437.2588235 |
| xinxiang | A224 | 470.5993933 |
| xinxiang | A225 | 505.9468439 |

|          |      |              |
|----------|------|--------------|
| xinxiang | A226 | 414. 4543452 |
| xinxiang | A228 | 498. 8538556 |
| xinxiang | A229 | 454. 9302326 |
| xinxiang | A231 | 534. 4909561 |
| xinxiang | A232 | 463. 1395349 |
| xinxiang | A235 | 513. 2164905 |
| xinxiang | A237 | 439. 323106  |
| xinxiang | A238 | 528. 9651163 |
| xinxiang | A241 | 419. 2995067 |
| xinxiang | A242 | 522. 2443706 |
| xinxiang | A244 | 521. 373317  |
| xinxiang | A245 | 467. 3939808 |
| xinxiang | A246 | 515. 6812437 |
| xinxiang | A248 | 454. 675153  |
| xinxiang | A249 | 645. 5009    |
| xinxiang | A250 | 469. 9264914 |
| xinxiang | A251 | 580. 8642811 |
| xinxiang | A252 | 433. 3062016 |
| xinxiang | A253 | 441. 6536108 |
| xinxiang | A254 | 395. 6601387 |
| xinxiang | A256 | 484. 504356  |
| xinxiang | A257 | 452. 9634027 |
| xinxiang | A260 | 646. 9508244 |
| xinxiang | A262 | 524. 7303542 |
| xinxiang | A263 | 637. 2203182 |
| xinxiang | A264 | 480. 0905753 |
| xinxiang | A265 | 450. 4465116 |
| xinxiang | A268 | 523. 3553466 |
| xinxiang | A269 | 454. 655814  |
| xinxiang | A270 | 498. 3329253 |
| xinxiang | A271 | 383. 2949816 |
| xinxiang | A272 | 487. 1952519 |
| xinxiang | A273 | 514. 0645995 |
| xinxiang | A274 | 546. 1700258 |
| xinxiang | A276 | 525. 6799557 |
| xinxiang | A280 | 585. 8222591 |
| xinxiang | A281 | 510. 9295866 |
| xinxiang | A282 | 447. 6255814 |
| xinxiang | A284 | 663. 8403773 |



|          |      |             |
|----------|------|-------------|
| xinxiang | A285 | 535.8921243 |
| xinxiang | A288 | 434.3283174 |
| xinxiang | A289 | 514.7667579 |
| xinxiang | A291 | 571.9755202 |
| xinxiang | A294 | 611.1835985 |
| xinxiang | A295 | 527.1807426 |
| xinxiang | A296 | 547.7641196 |
| xinxiang | A297 | 511.5671075 |
| xinxiang | A298 | 562.6095471 |
| xinxiang | A300 | 373.7451274 |
